# Supplementary material for: Effect of Insulin Resistance on Monounsaturated Fatty Acid Levels: A Multi-cohort Non-targeted Metabolomics and Mendelian Randomization Study
Source: PLOS journal article supplement (doi:10.1371/journal.pgen.1006379), 2016-10-21
Supplement: S6 (10.1371/journal.pgen.1006379.s006) [file journal.pgen.1006379.s006.PDF › journal.pgen.1006379.s006.PDF]

# Palmitoleic acid

PIVUS/Twingene (n=2,613)

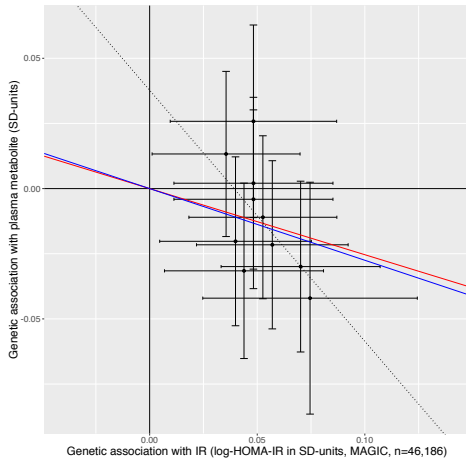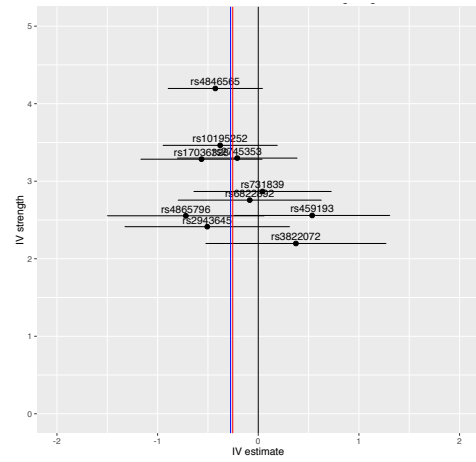

KORA/TwinsUK (n=7,776)

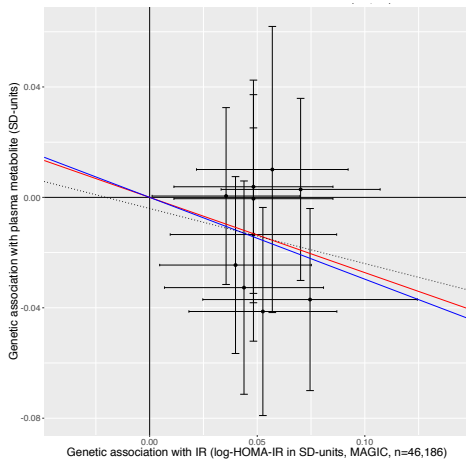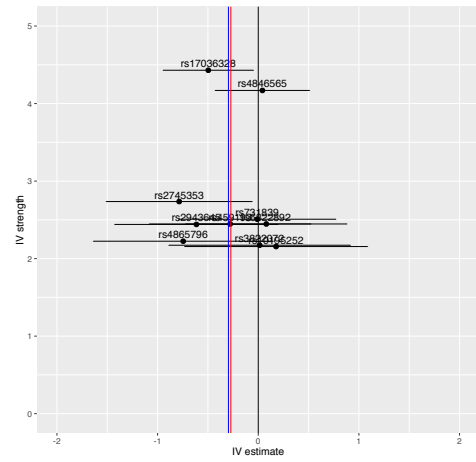

CHARGE (n=8,961)

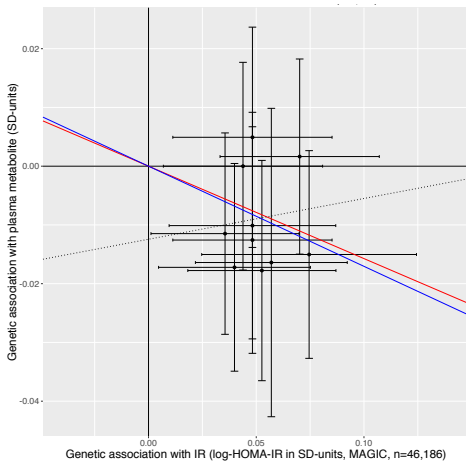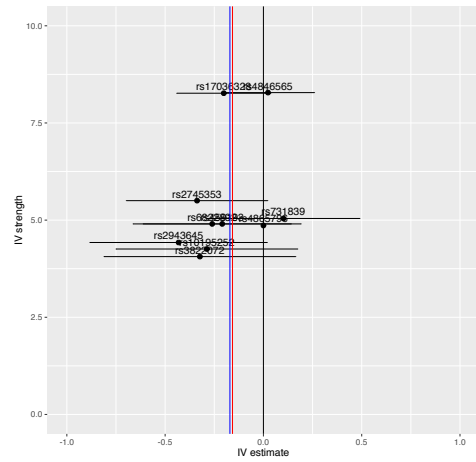

**S4 Figure.** Left panel: Scatter plots of genetic associations with the outcome against genetic associations with insulin resistance (log-HOMA-IR, n = 46,186) adjusted for age and sex in SD-units. Right panel: Funnel plots of instrument strength against instrumental variables estimates. Regression lines indicate instrumental variable estimates for inverse variance weighted (red), likelihood-based (blue), and Egger regression (dotted) MR analysis. Error bars indicate 95% CI.

# Oleic acid

PIVUS/Twingene (n=2,613)

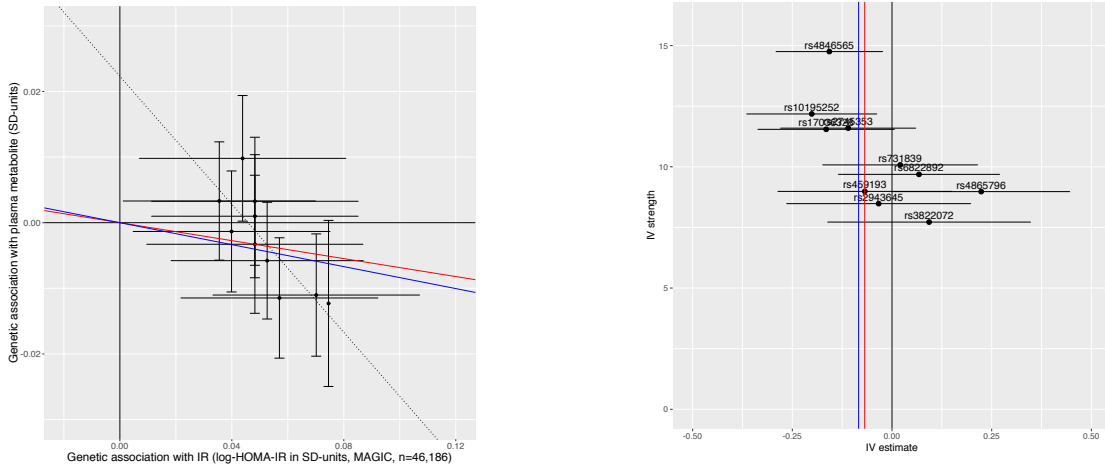

KORA/TwinsUK (n=7,768)

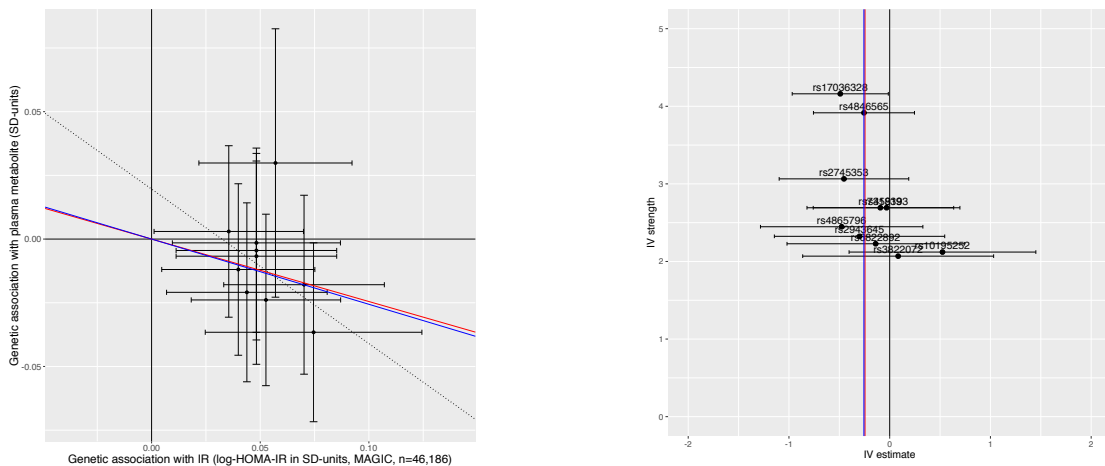

CHARGE (n=8,961)

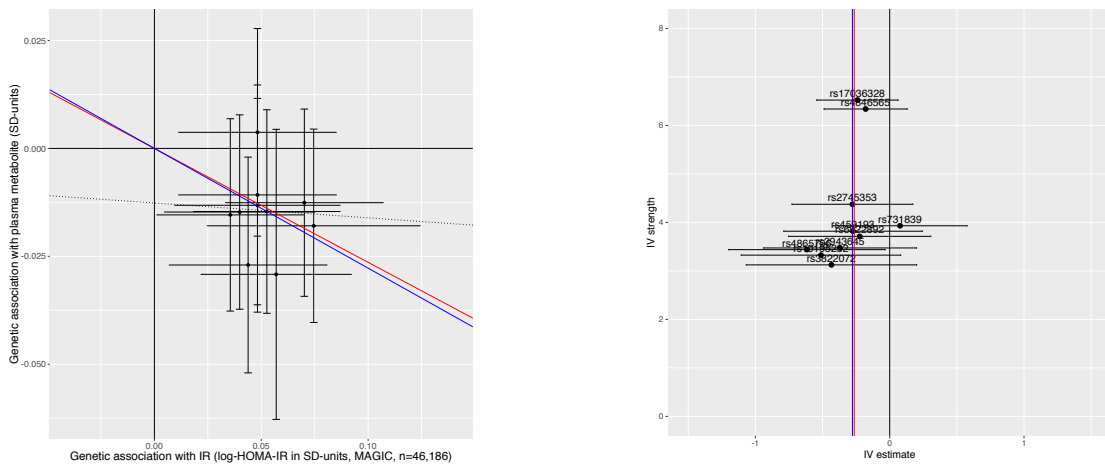

**S4 Figure.** Left panel: Scatter plots of genetic associations with the outcome against genetic associations with insulin resistance (log-HOMA-IR, n = 46,186) adjusted for age and sex in SD-units. Right panel: Funnel plots of instrument strength against instrumental variables estimates. Regression lines indicate instrumental variable estimates for inverse variance weighted (red), likelihood-based (blue), and Egger regression (dotted) MR analysis. Error bars indicate 95% CI.

# Tyrosine

PIVUS/Twingene (n=2,613)

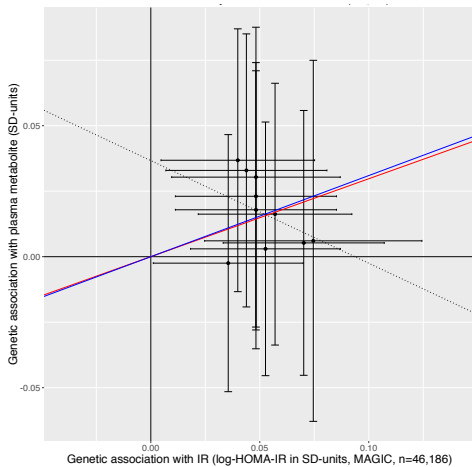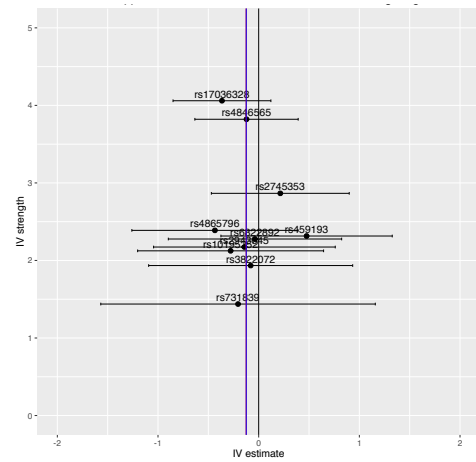

KORA/TwinsUK (n=7,807)

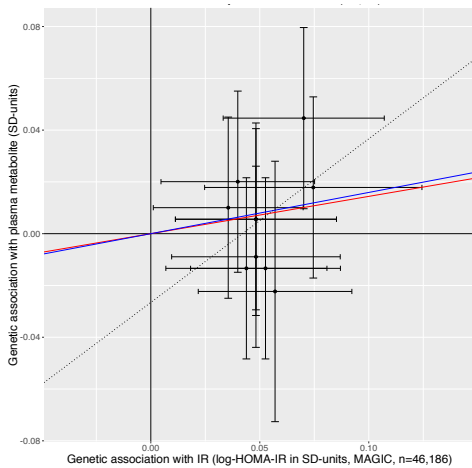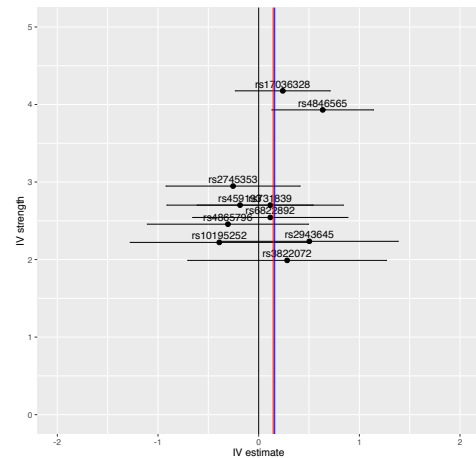

Finnish cohorts(n=8,330)

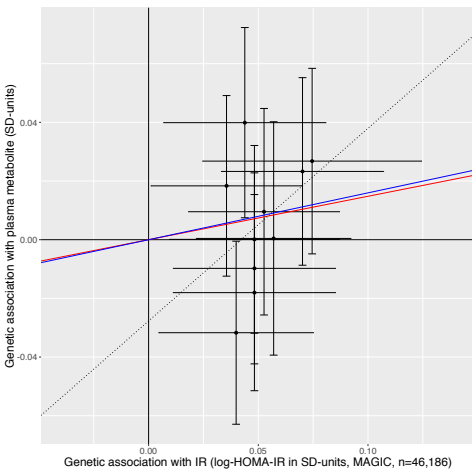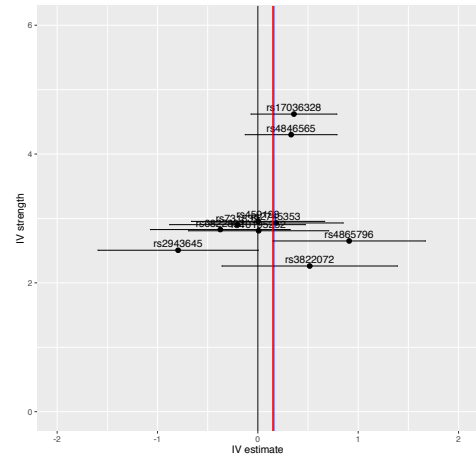

**S4 Figure.** Left panel: Scatter plots of genetic associations with the outcome against genetic associations with insulin resistance (log-HOMA-IR, n = 46,186) adjusted for age and sex in SD-units. Right panel: Funnel plots of instrument strength against instrumental variables estimates. Regression lines indicate instrumental variable estimates for inverse variance weighted (red), likelihood-based (blue), and Egger regression (dotted) MR analysis. Error bars indicate 95% CI.

# Hippuric acid

PIVUS/Twingene (n=2,613)

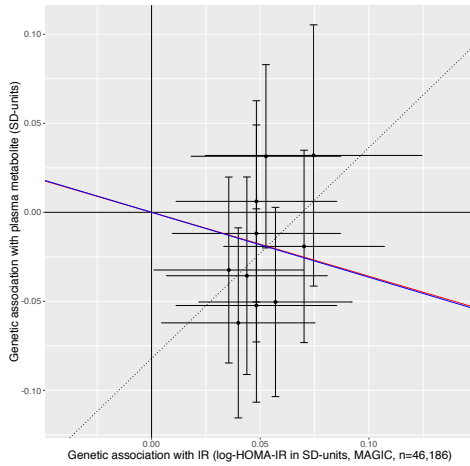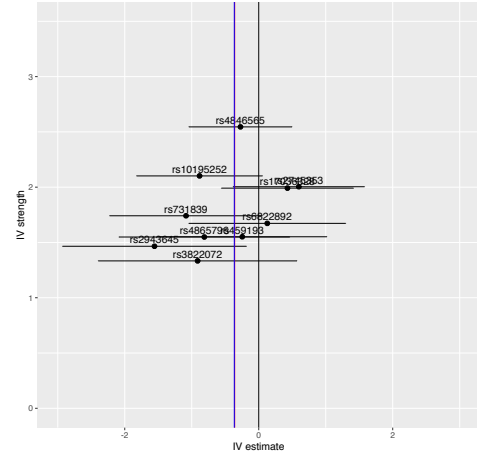

KORA/TwinsUK (n=7,806)

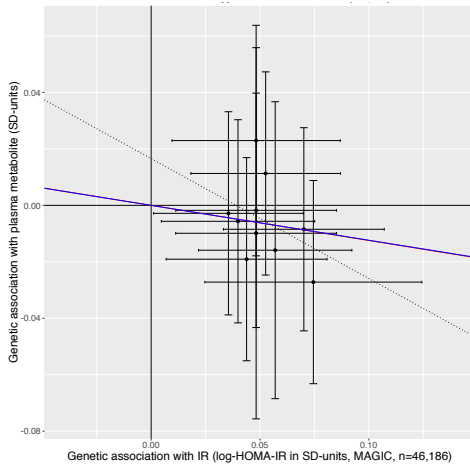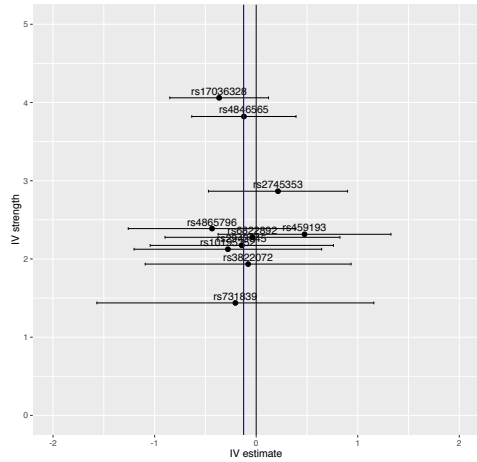

**S4 Figure.** Left panel: Scatter plots of genetic associations with the outcome against genetic associations with insulin resistance (log-HOMA-IR, n = 46,186) adjusted for age and sex in SD-units. Right panel: Funnel plots of instrument strength against instrumental variables estimates. Regression lines indicate instrumental variable estimates for inverse variance weighted (red), likelihood-based (blue), and Egger regression (dotted) MR analysis. Error bars indicate 95% CI.

# Monoacylglycerol 18:1

PIVUS/Twingene (n=2,613)

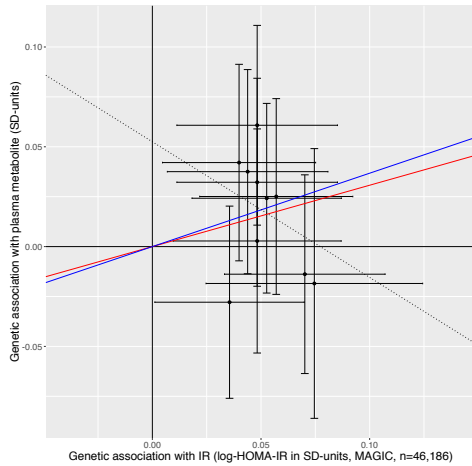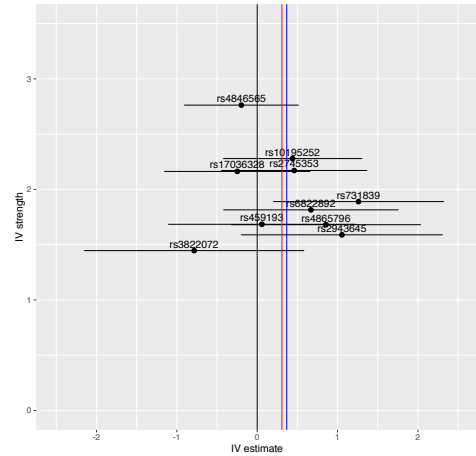

KORA/TwinsUK (n=5,717)

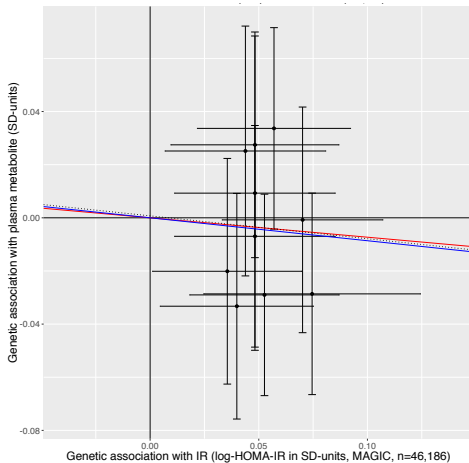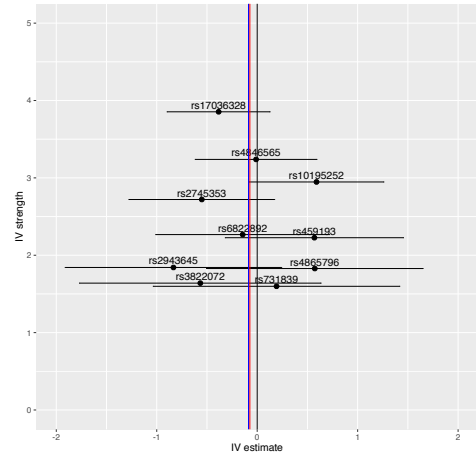

**S4 Figure.** Left panel: Scatter plots of genetic associations with the outcome against genetic associations with insulin resistance (log-HOMA-IR, n = 46,186) adjusted for age and sex in SD-units. Right panel: Funnel plots of instrument strength against instrumental variables estimates. Regression lines indicate instrumental variable estimates for inverse variance weighted (red), likelihood-based (blue), and Egger regression (dotted) MR analysis. Error bars indicate 95% CI.

# Monoacylglycerol 18:2

PIVUS/Twingene (n=2,613)

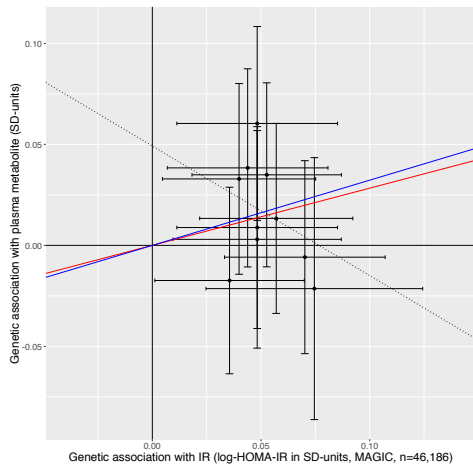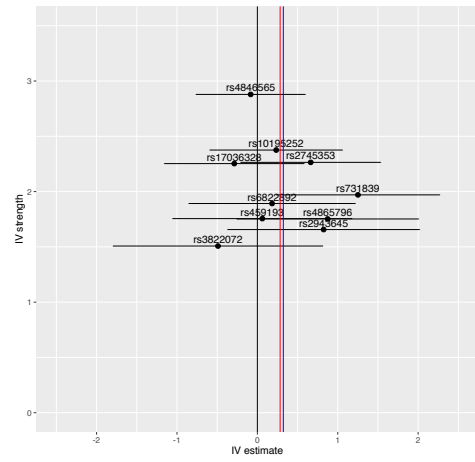

KORA/TwinsUK (n=2,797)

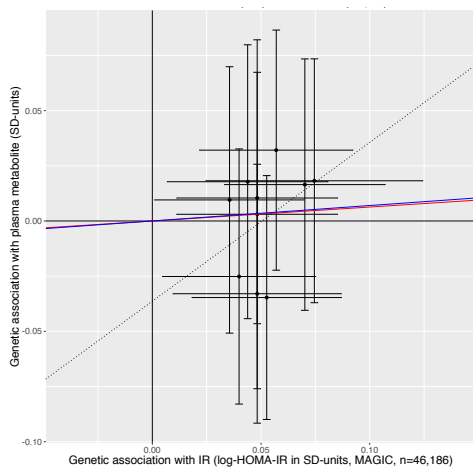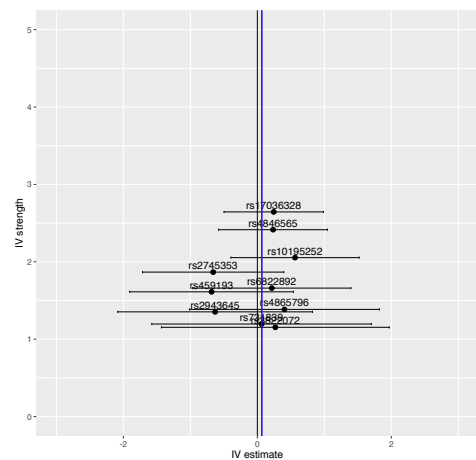

**S4 Figure.** Left panel: Scatter plots of genetic associations with the outcome against genetic associations with insulin resistance (log-HOMA-IR, n = 46,186) adjusted for age and sex in SD-units. Right panel: Funnel plots of instrument strength against instrumental variables estimates. Regression lines indicate instrumental variable estimates for inverse variance weighted (red), likelihood-based (blue), and Egger regression (dotted) MR analysis. Error bars indicate 95% CI.

# Gamma-tocopherol

PIVUS/Twingene (n=2,613)

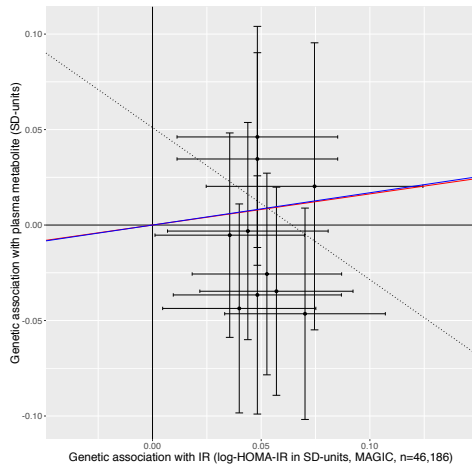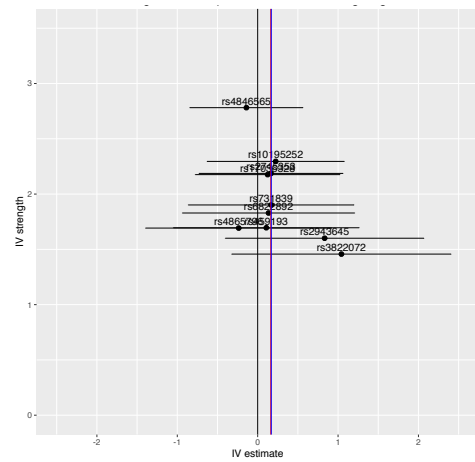

KORA/TwinsUK (n=7,203)

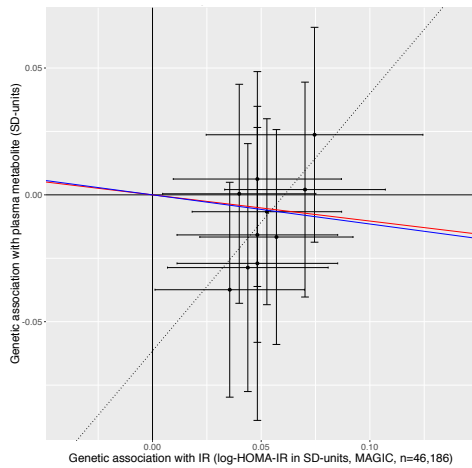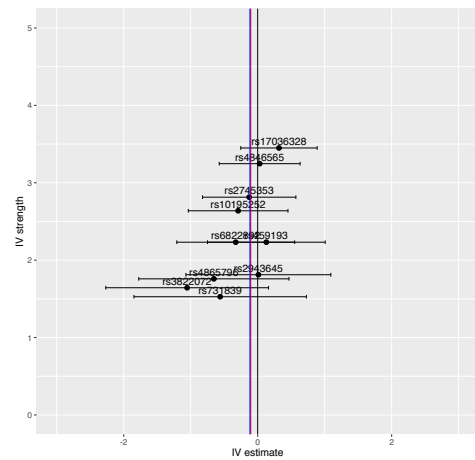

**S4 Figure.** Left panel: Scatter plots of genetic associations with the outcome against genetic associations with insulin resistance (log-HOMA-IR, n = 46,186) adjusted for age and sex in SD-units. Right panel: Funnel plots of instrument strength against instrumental variables estimates. Regression lines indicate instrumental variable estimates for inverse variance weighted (red), likelihood-based (blue), and Egger regression (dotted) MR analysis. Error bars indicate 95% CI.

## 3a,6b,7b-Trihydroxy-5b-cholanoic acid

PIVUS/Twingene (n=2,613)

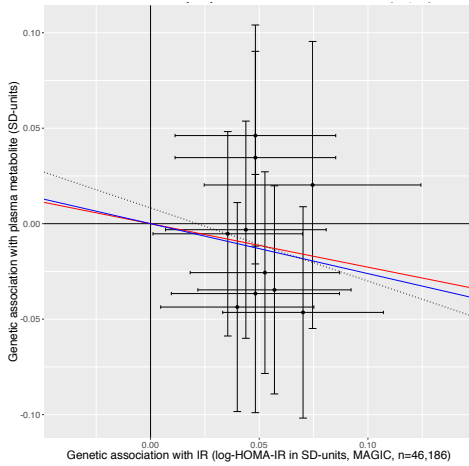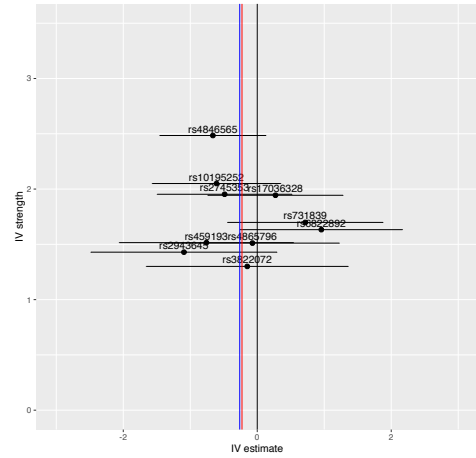

## Monoacylglycerol 14:0

PIVUS/Twingene (n=2,613)

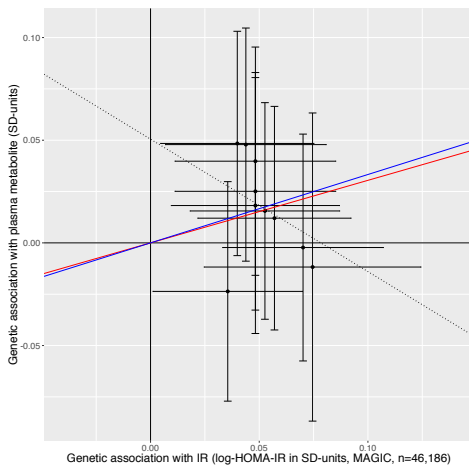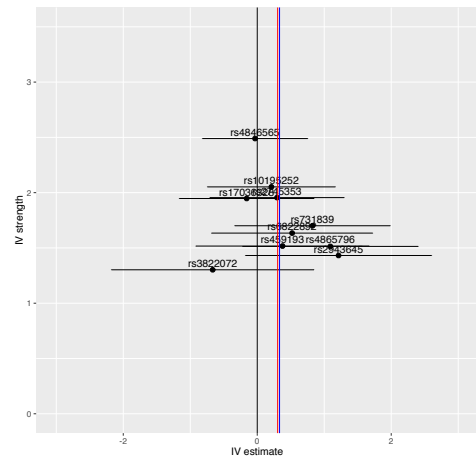

**S4 Figure.** Left panel: Scatter plots of genetic associations with the outcome against genetic associations with insulin resistance (log-HOMA-IR, n = 46,186) adjusted for age and sex in SD-units. Right panel: Funnel plots of instrument strength against instrumental variables estimates. Regression lines indicate instrumental variable estimates for inverse variance weighted (red), likelihood-based (blue), and Egger regression (dotted) MR analysis. Error bars indicate 95% CI.



PIVUS/Twingene (n=2,613)

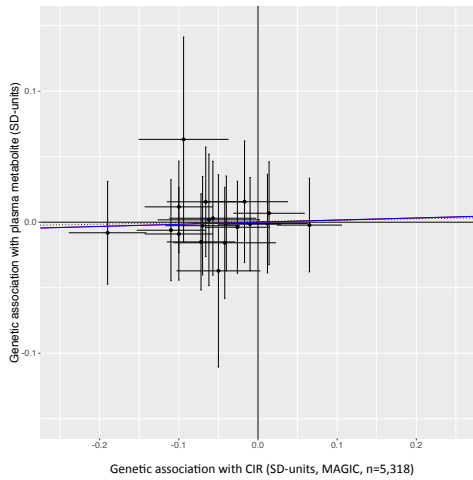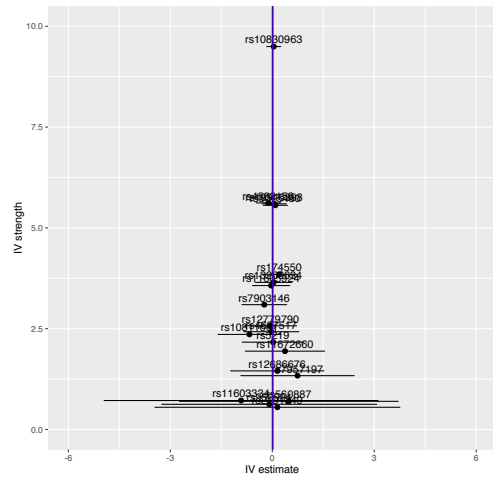

KORA/TwinsUK (n=6,812)

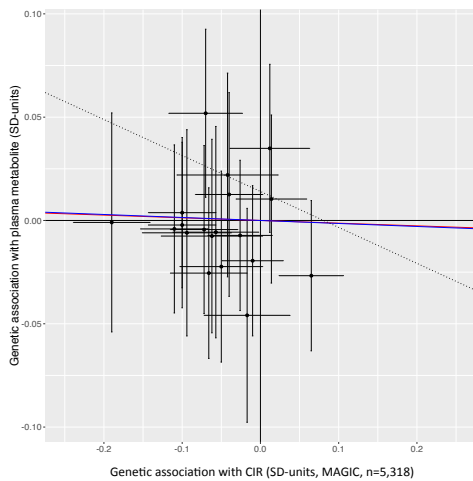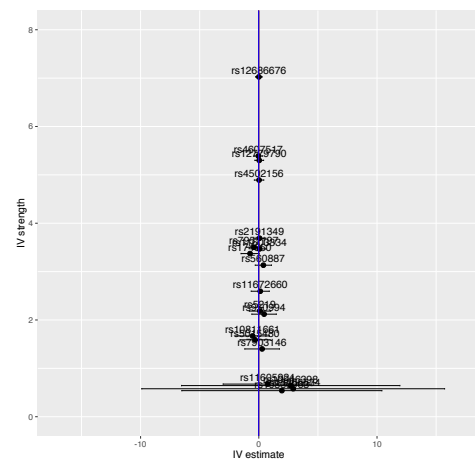

### 3a,6b,7b-Trihydroxy-5b-cholanoic acid

PIVUS/Twingene (n=2,613)

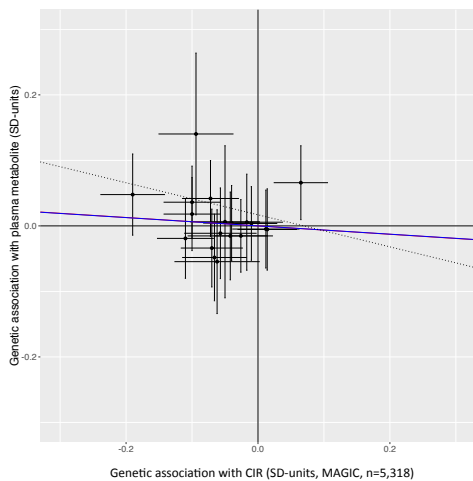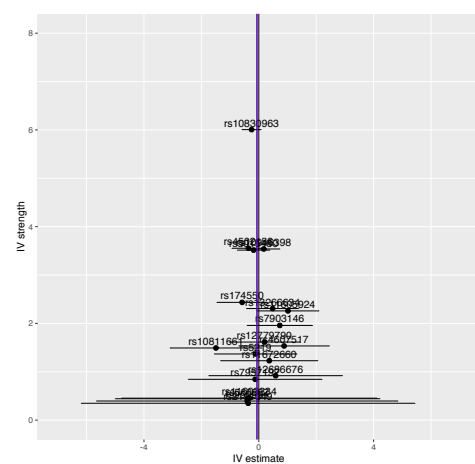

**S4 Figure.** Left panel: Scatter plots of genetic associations with the outcome against genetic associations with insulin secretion (CIR, n = 5,318) adjusted for age and sex in SD-units. Right panel: Funnel plots of instrument strength against instrumental variables estimates. Regression lines indicate instrumental variable estimates for inverse variance weighted (red), likelihood-based (blue), and Egger regression (dotted) MR analysis. Error bars indicate 95% CI.
